# Supplementary material for: Stretchable strain sensor of composite hydrogels with high fatigue resistance and low hysteresis
Source: Royal Society of Chemistry journal article supplement (doi:10.1039/d2ta07447h), 2022-01-01
Supplement: d2ta07447h2.pdf [file d2ta07447h2.pdf]

## Supporting Information

### Stretchable strain sensor of composite hydrogels with high fatigue resistance and low hysteresis

Jinyuan Liu <sup>a,b †</sup>, Xi Chen <sup>b †</sup>, Bonan Sun <sup>b</sup>, Haoyu Guo <sup>b</sup>, Yuhan Guo <sup>a</sup>, Shengyuan  
Zhang <sup>b</sup>, Ran Tao <sup>c,\*</sup>, Qingsheng Yang <sup>a,\*</sup>, Jingda Tang <sup>b,\*</sup>

<sup>a</sup> Department Engineering Mechanics, Beijing University of Technology, Beijing 100124,  
China

<sup>b</sup> State Key Laboratory for Strength and Vibration of Mechanical Structures, Department of  
Engineering Mechanics, Xi'an Jiaotong University, Xi'an, 710049, China.

<sup>c</sup> Institute of Advanced Structure Technology, Beijing Institute of Technology, Beijing 100081,  
China

E-mails: [tangjd@mail.xjtu.edu.cn](mailto:tangjd@mail.xjtu.edu.cn), [qsyang@bjut.edu.cn](mailto:qsyang@bjut.edu.cn), [taoran@bit.edu.cn](mailto:taoran@bit.edu.cn)

<sup>†</sup> These authors contributed equally to this work.

**Movie S1:** The composite hydrogel strain sensor is used to monitor the beating of a porcine heart *in vitro*. We use the portable pulsatile pump to generate pulsatile flow of water and connect it to the porcine heart. Water flows in the anterior vena cava, generates a pulsatile systole/ diastole of the heart, and flows out from the pulmonary artery. The inflow and outflow of water induce the heart to beat for 500 cycles (elapsed time, 1000s) at a frequency of 0.5Hz. The composite hydrogel strain sensor is attached to the heart to obtain the beating signal. The resistance changes accordingly and stably with the beating of the heart.

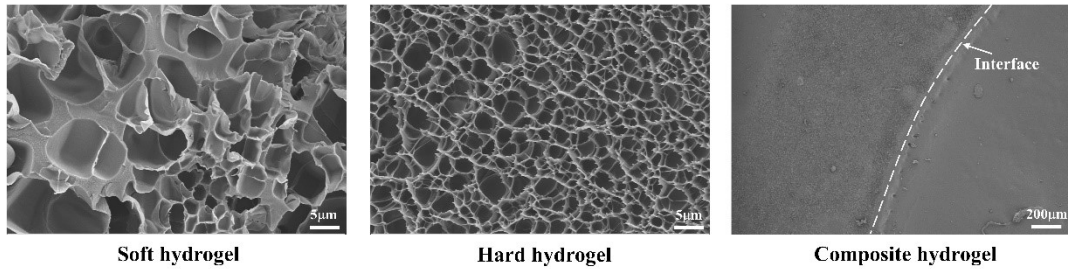

**Figure S1.** SEM images of the freeze-dried soft hydrogel, hard hydrogel and composite hydrogel.

**Table S1.** Comparison of the composite hydrogel in this work with previously reported hydrogels or elastomers.

| <b>Refs.</b>     | <b>Materials</b>                                           | <b>Stretch <math>\lambda</math></b> | <b>Hysteresis</b> |
|------------------|------------------------------------------------------------|-------------------------------------|-------------------|
| <b>This work</b> | <b>Composite hydrogel</b>                                  | <b>3.0</b>                          | <b>&lt;3%</b>     |
| [35]             | PNDU-CNF@CNT <sub>1%</sub> hydrogel                        | 2.5                                 | ~38.6%            |
| [34]             | P(AM3-APBA <sub>0.06</sub> ) NaCl <sub>1.72</sub> hydrogel | 3.0                                 | ~10%              |
|                  |                                                            | 4.0                                 | ~10%              |
| [33]             | PAAFC-L hydrogel                                           | 3.0                                 | ~30%              |
| [36]             | P(AAm-co-MAAc) hydrogel                                    | 2.0                                 | ~32%              |
| [37]             | PAM/PF127 hydrogel                                         | 1.3                                 | ~15%              |
|                  |                                                            | 1.5                                 | ~17%              |
|                  |                                                            | 1.7                                 | ~21%              |
| [26]             | PDMS composite                                             | 1.5                                 | ~4%               |
|                  |                                                            | 1.8                                 | ~5%               |
| [38]             | 2D PVA/GO hydrogel                                         | 1.8                                 | ~32%              |
| [39]             | Alginate-polyacrylamide                                    | 1.2                                 | ~20%              |
| [40]             | PAAm-PVA hydrogel                                          | 1.4                                 | ~39.6%            |
| [41]             | PAMPS/PAAm DN hydrogel                                     | 1.5                                 | ~22.8%            |
|                  |                                                            | 1.65                                | ~46%              |
|                  |                                                            | 1.8                                 | ~56.8%            |

**Table S2.** Comparison of the composite hydrogel strain sensor in this work with previously reported flexible sensors.

| <b>Refs.</b>     | <b>Materials</b>          | <b>Strain <math>\epsilon</math></b> | <b>Hysteresis</b> |
|------------------|---------------------------|-------------------------------------|-------------------|
| <b>This work</b> | <b>Composite hydrogel</b> | <b>2.0</b>                          | <b>&lt;3%</b>     |
| [42]             | Lattice-structure PIFS    | 0.7                                 | ~2.4%             |
| [43]             | AuNWs/latex               | 2.0                                 | ~25.8%            |
| [44]             | AgNWs/PDMS                | 0.6                                 | ~47.2%            |
| [45]             | AgNW/PDMS                 | 0.5                                 | ~2.7%             |
| [46]             | G-PDMS/RGO                | 1.0                                 | ~47.3%            |
| [47]             | AgNWs/PDMS                | 0.6                                 | ~30%              |
| [48]             | PEDOT:PSS/hydrogel        | 0.8                                 | ~39.1%            |
| [49]             | PEDOT:PSS/PDMS            | 0.1                                 | 5.4%              |
|                  |                           | 0.2                                 | 2.2%              |
|                  |                           | 0.3                                 | 9%                |
